# Supplementary material for: MicroRNA‐containing extracellular vesicles released from endothelial colony‐forming cells modulate angiogenesis during ischaemic retinopathy
Source: PubMed Central journal article supplement (PMC5706503; doi:10.1111/jcmm.13251), 2017-06-20
Supplement: JCMM-21-3405-s001.pdf [file JCMM-21-3405-s001.pdf]

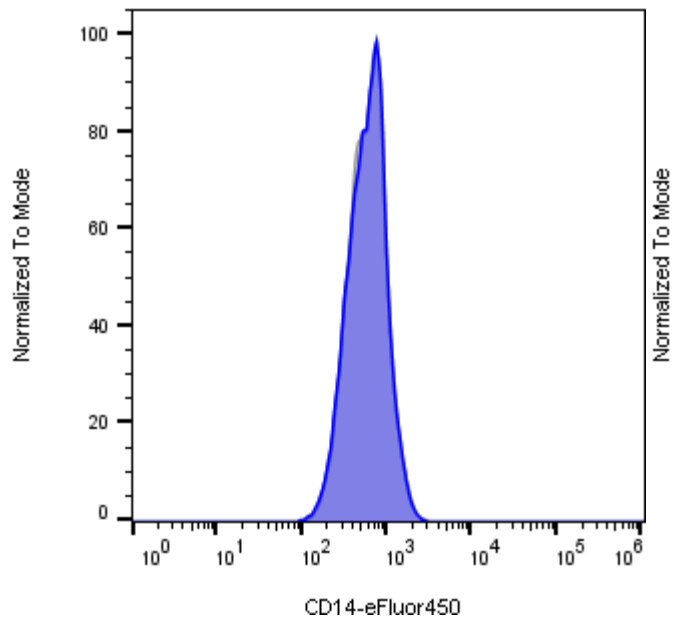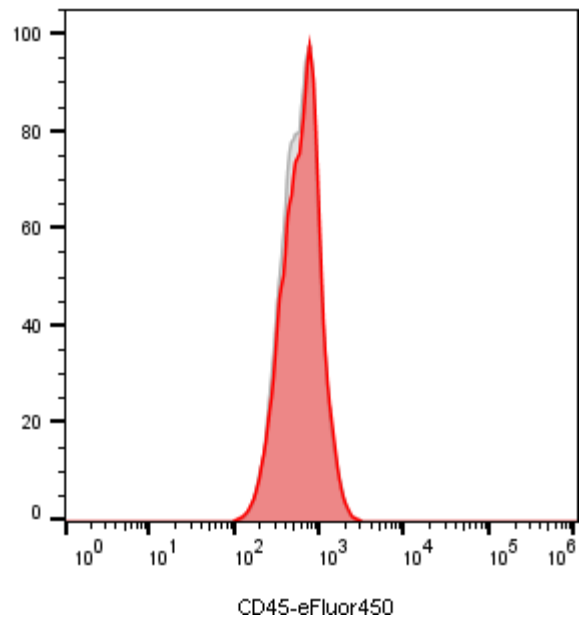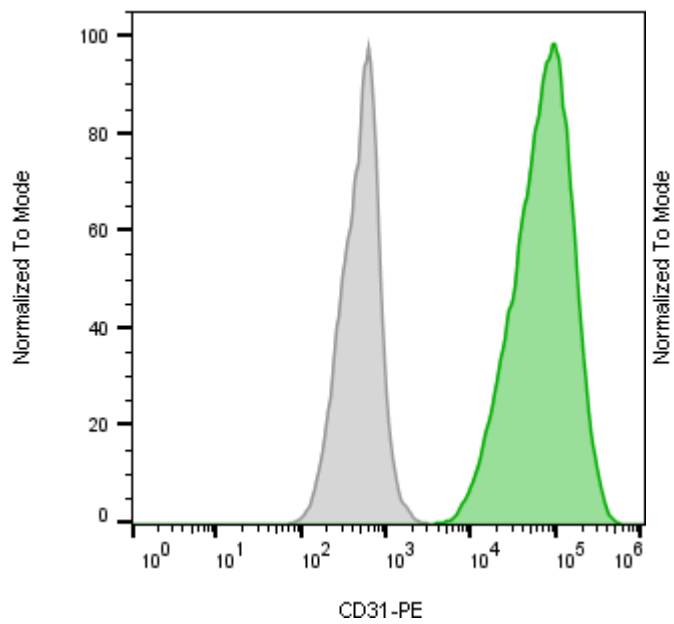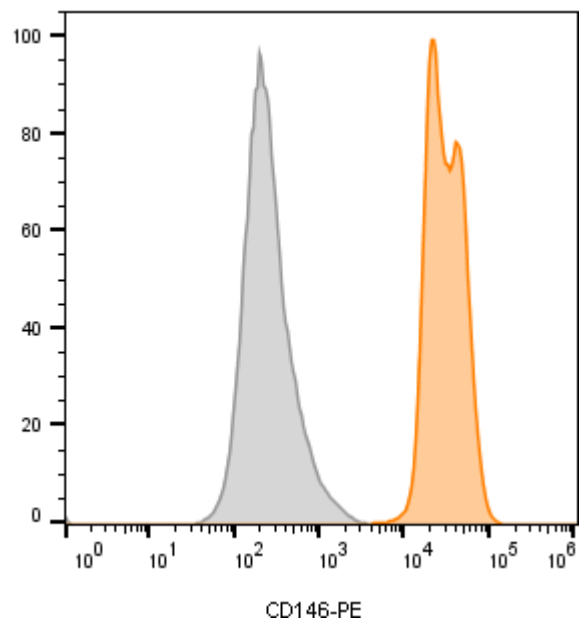

| Cell Surface Marker | Expression |
|---------------------|------------|
| CD14-eFluor450      | 0%         |
| CD45-eFluor450      | 0%         |
| CD31-PE             | 99.9%      |
| CD146-PE            | 99.9%      |
