# Supplementary material for: MicroRNA‐containing extracellular vesicles released from endothelial colony‐forming cells modulate angiogenesis during ischaemic retinopathy
Source: PubMed Central journal article supplement (PMC5706503; doi:10.1111/jcmm.13251), 2017-06-20

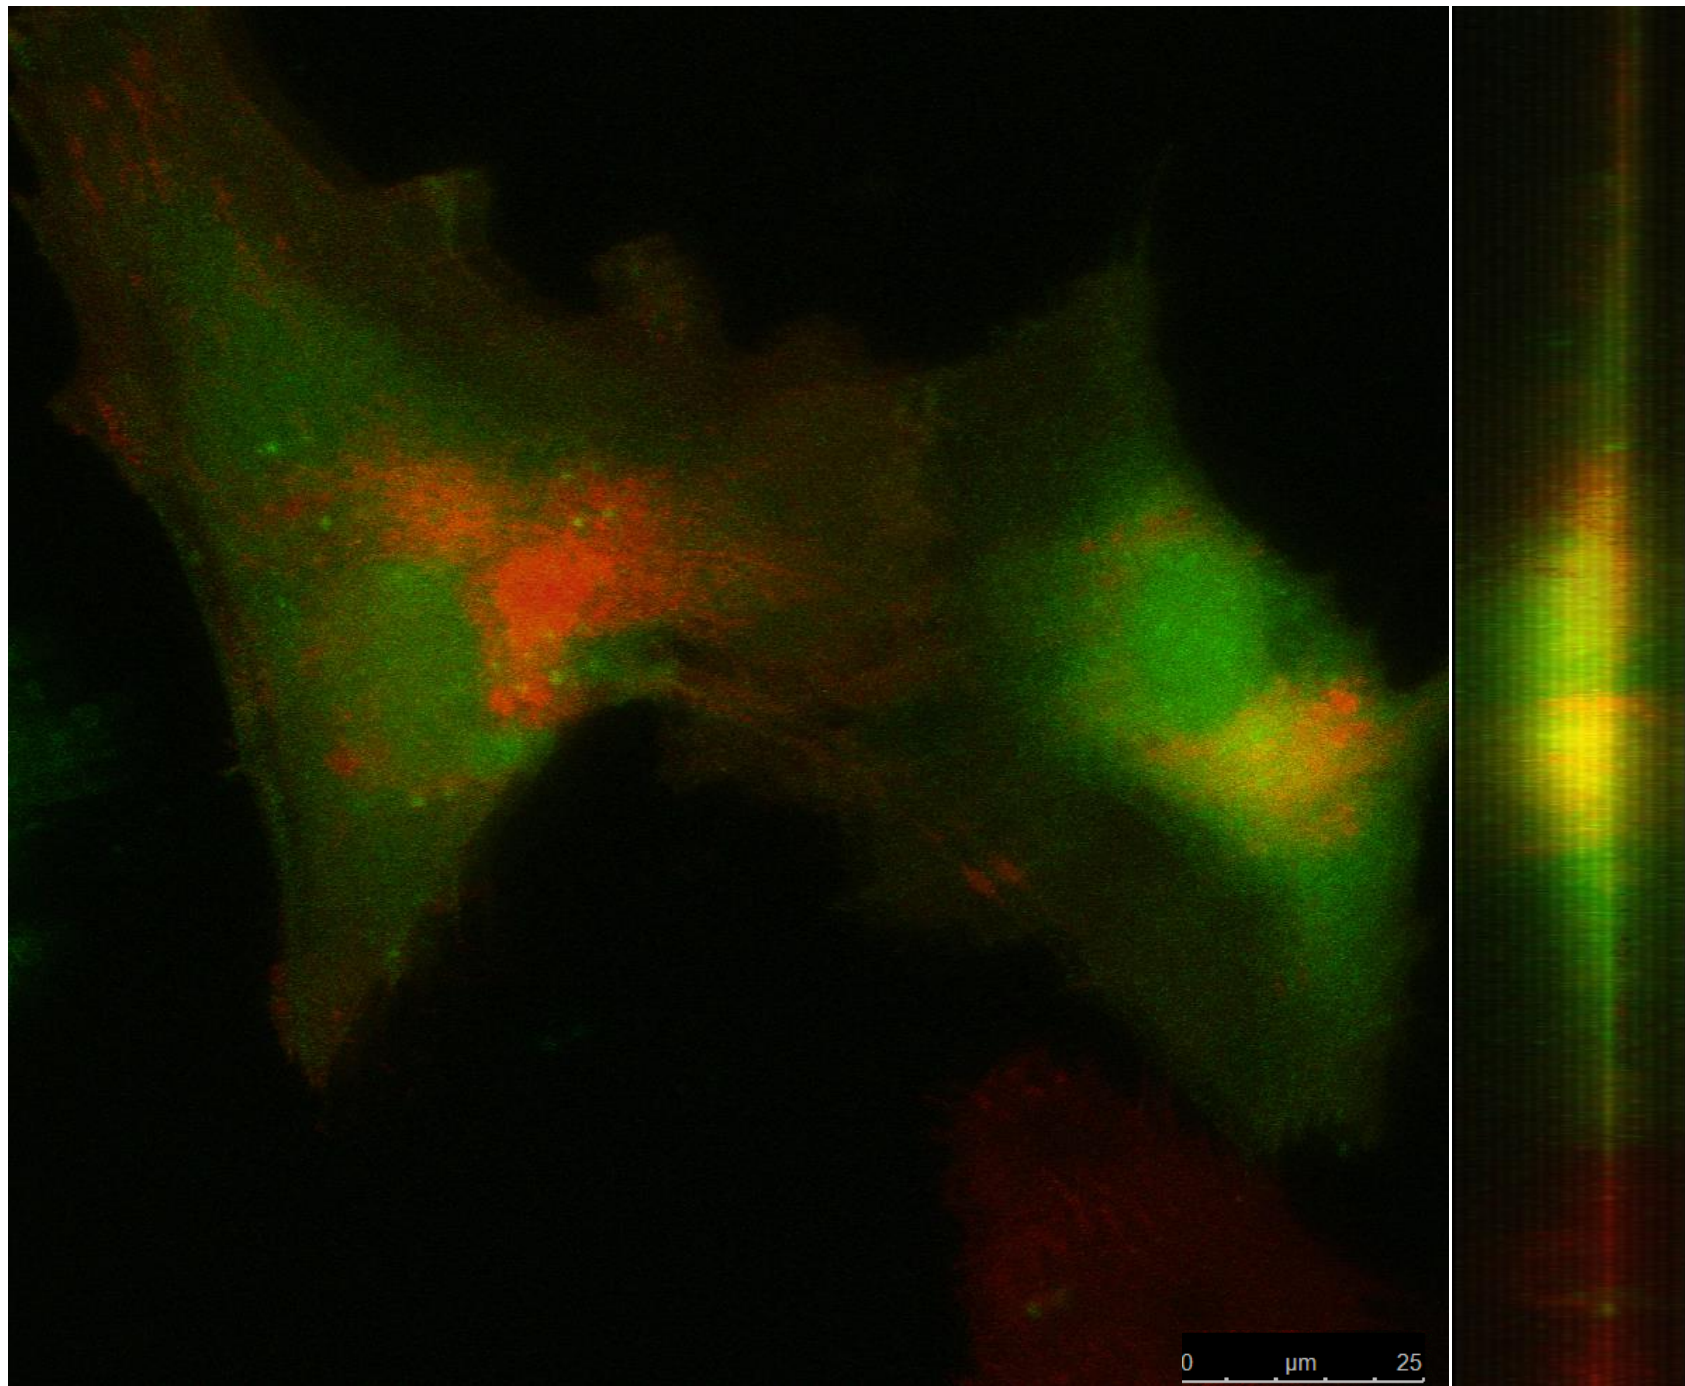

Supplement: JCMM-21-3405-s002.pdf [file JCMM-21-3405-s002.pdf]
