# Supplementary material for: MicroRNA‐containing extracellular vesicles released from endothelial colony‐forming cells modulate angiogenesis during ischaemic retinopathy
Source: PubMed Central journal article supplement (PMC5706503; doi:10.1111/jcmm.13251), 2017-06-20
Supplement: JCMM-21-3405-s004.pdf [file JCMM-21-3405-s004.pdf]

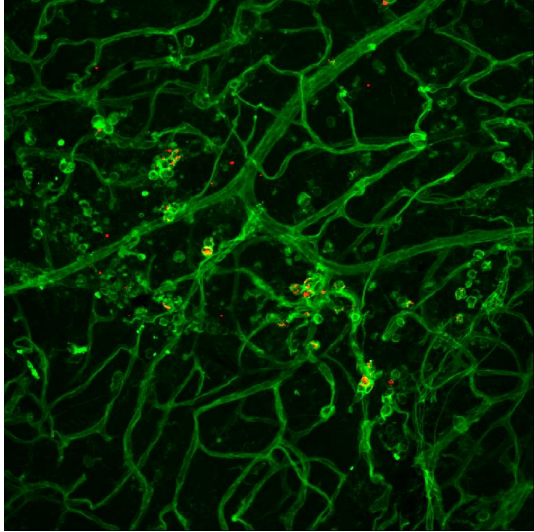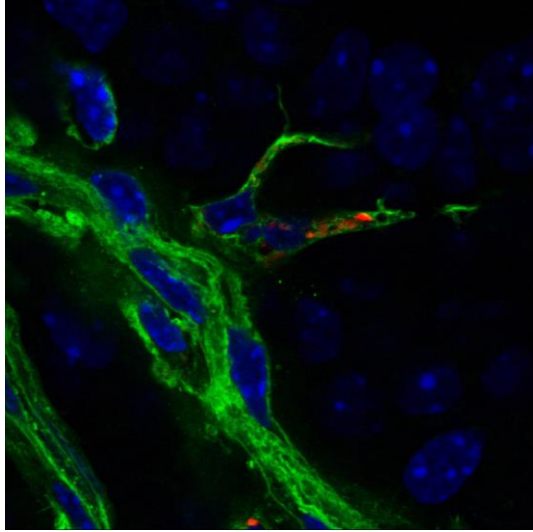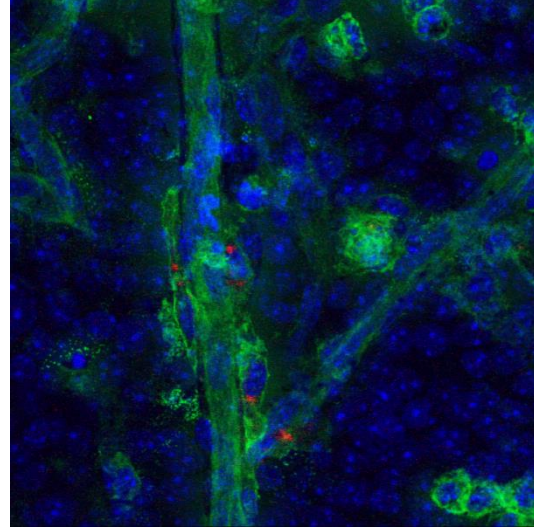

Isolectin B4  
TO-PRO-3  
DiI (EVs)
